# Supplementary material for: Transcriptional signatures of the small intestinal mucosa in response to ethanol in transgenic mice rich in endogenous n3 fatty acids
Source: PubMed Central journal article supplement (PMC7670449; doi:10.1038/s41598-020-76959-6), 2020-11-16
Supplement: 41598_2020_76959_MOESM2_ESM.pdf [file 41598_2020_76959_MOESM2_ESM.pdf]

## Supplemental Information

### **Transcriptional signatures of the small intestinal mucosa in response to ethanol in transgenic mice rich in endogenous n3 fatty acids**

Josiah E. Hardesty, Jeffrey B. Warner, Ying L. Song, Eric C. Rouchka, Chih-Yu Chen, Jing X. Kang, Craig J. McClain, Dennis R. Warner, and Irina A. Kirpich

## Supplemental Figures:

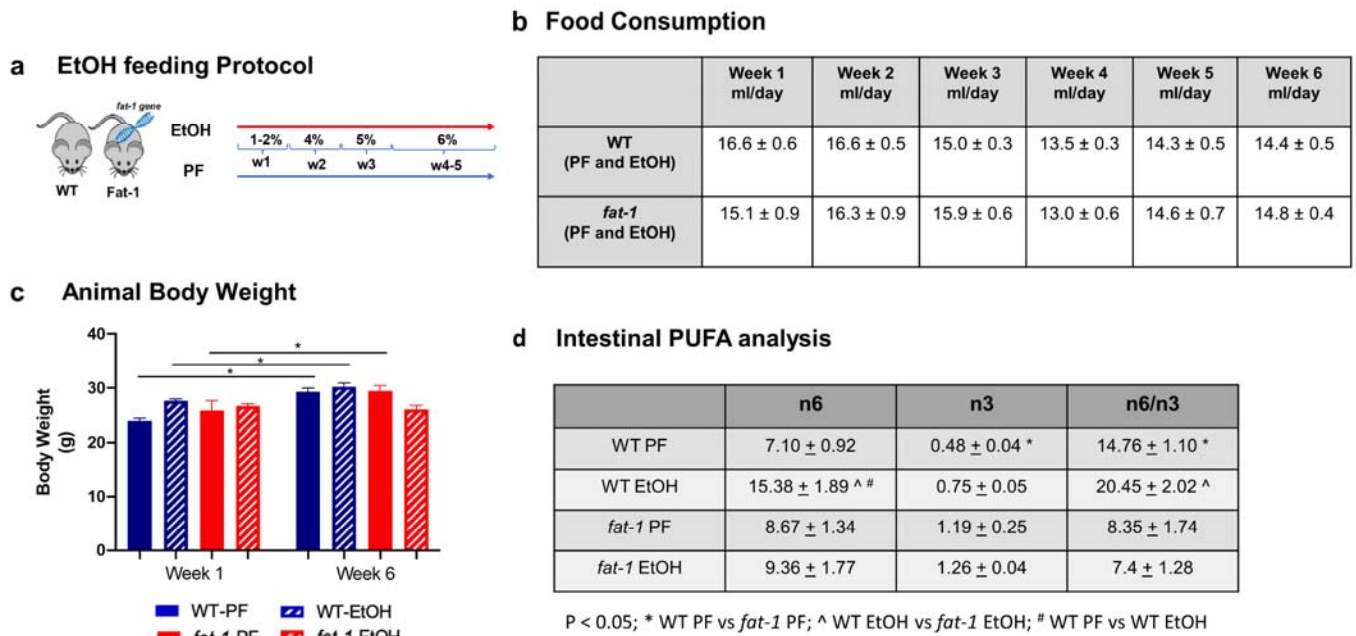

**Supplemental Figure S1. Experimental Design and Metabolic Parameters.** (a) EtOH feeding model. (b) Average food consumption by experimental animals. (c) Beginning and ending body weights of PF and EtOH-fed WT and *fat-1* mice. (d) Ileum n3 and n6 PUFA levels demonstrating that *fat-1* mice have elevated n3 PUFAs relative to WT mice. Data are presented as mean ± SEM. \* p < 0.05. n=3-5 mice per group.

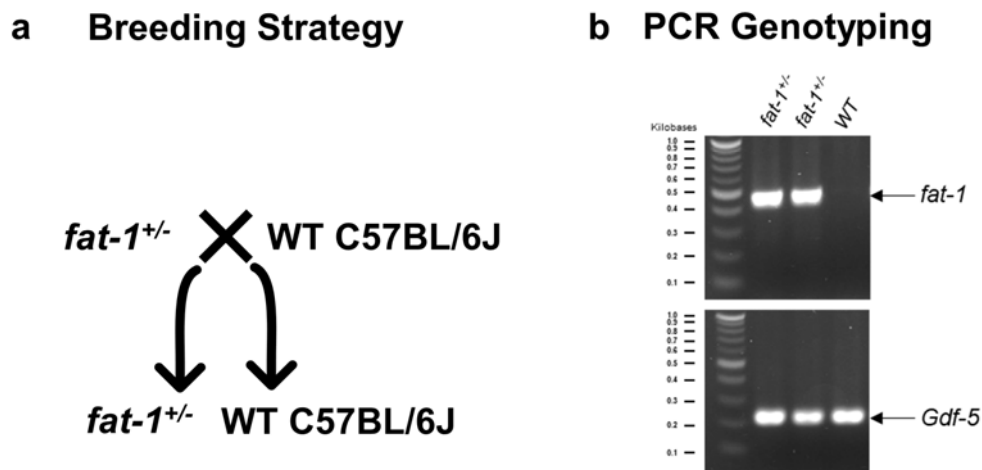

**Supplemental Figure S2. Description of the *fat-1* mice.** (a) Breeding strategy to develop *fat-1*<sup>+/-</sup> heterozygous mice and WT littermates. (b) Genotype confirmation by PCR and gel electrophoresis. The *fat-1* PCR product is only present in samples from *fat-1* mice whereas *Gdf-5* is present in all samples (positive control) in the representative gel.

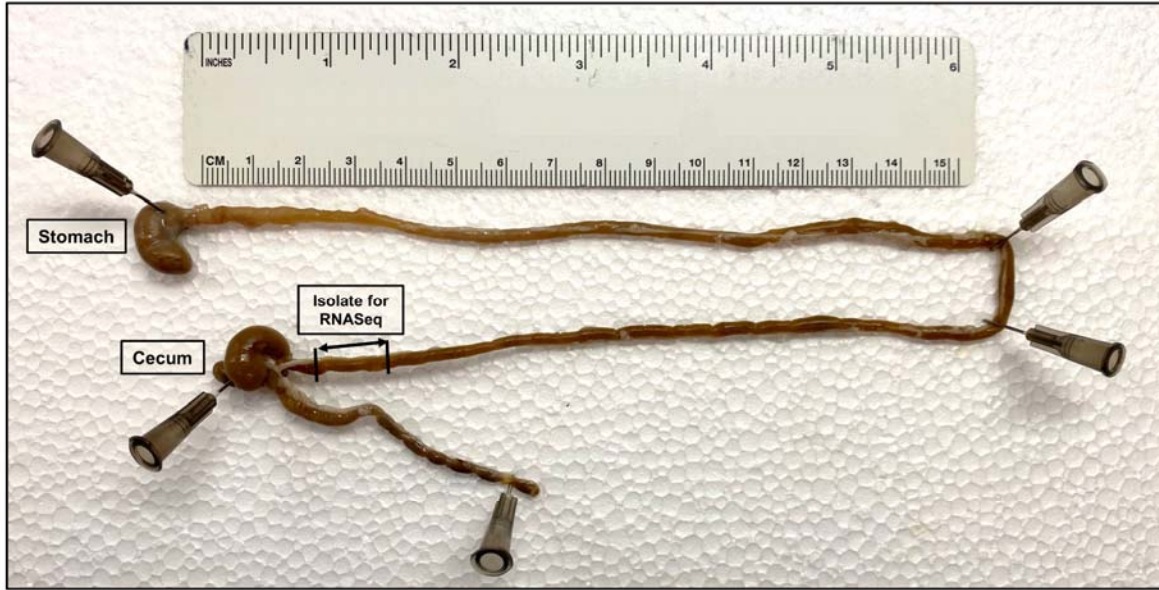

**Supplemental Figure S3. Mouse ileum isolation.** Layout of mouse gastrointestinal tract identifying the segment of intestine isolated for ileum RNASeq.

**Supplemental Tables:**

**Supplementary Table S1.** List of the top 10 up-regulated and down-regulated genes (by fold-change) in the intestinal mucosa in *fat-1* compared to WT pair-fed control mice (selected from 420 up- and 210 down-regulated genes).

| Identifier         | Gene title      | Fold change | p-value | q-value   |
|--------------------|-----------------|-------------|---------|-----------|
| ENSMUSG00000048473 | <i>Gm766</i>    | 40.6        | 0.00005 | 0.0022175 |
| ENSMUSG00000045991 | <i>Onecut2</i>  | 32.47       | 0.00005 | 0.0022175 |
| ENSMUSG00000059654 | <i>Reg1</i>     | 20.7        | 0.00005 | 0.0022175 |
| ENSMUSG00000076540 | <i>Igkv4-80</i> | 16.8        | 0.00005 | 0.0022175 |
| ENSMUSG00000046213 | <i>Cym</i>      | 15.2        | 0.00005 | 0.0022175 |
| ENSMUSG00000095429 | <i>Ighv5-12</i> | 12.0        | 0.0006  | 0.016949  |
| ENSMUSG00000054932 | <i>Afp</i>      | 10.2        | 0.00005 | 0.0022175 |
| ENSMUSG00000076536 | <i>Igkv4-86</i> | 9.3         | 0.00005 | 0.0022175 |
| ENSMUSG00000036853 | <i>Mcoln3</i>   | 9.0         | 0.00005 | 0.0022175 |
| ENSMUSG00000067235 | <i>H2-Q10</i>   | 8.8         | 0.00005 | 0.0022175 |
| ENSMUSG00000074442 | <i>Defa-rs7</i> | -26.4       | 0.00005 | 0.0022175 |
| ENSMUSG00000094662 | <i>Gm21498</i>  | -19.1       | 0.00005 | 0.0022175 |
| ENSMUSG00000094993 | <i>Igkv4-51</i> | -15.0       | 0.00035 | 0.011114  |
| ENSMUSG00000031089 | <i>Slc6a14</i>  | -11.9       | 0.00005 | 0.0022175 |
| ENSMUSG00000104452 | <i>Ighv8-8</i>  | -11.4       | 0.00005 | 0.0022175 |
| ENSMUSG00000096844 | <i>Igkv6-14</i> | -8.6        | 0.00085 | 0.0222623 |
| ENSMUSG00000026109 | <i>Tmeff2</i>   | -6.9        | 0.0005  | 0.0147833 |
| ENSMUSG00000033847 | <i>Pla2g4c</i>  | -6.4        | 0.00005 | 0.0022175 |
| ENSMUSG00000078706 | <i>Gm53</i>     | -5.7        | 0.00005 | 0.0022175 |
| ENSMUSG00000094198 | <i>Ighv1-50</i> | -5.6        | 0.00005 | 0.0022175 |

**Supplementary Table S2.** List of up-regulated and down-regulated genes in the intestinal mucosa in WT EtOH compared to WT pair-fed control mice. The top 10 up-regulated and down-regulated genes (by fold-change) are shown in a list (selected from 481 up- and 663 down-regulated genes).

| Identifier         | Gene title      | Fold change | p-value | q-value    |
|--------------------|-----------------|-------------|---------|------------|
| ENSMUSG00000032122 | <i>Slc37a2</i>  | 47.2        | 0.00005 | 0.00128109 |
| ENSMUSG00000073608 | <i>Gm6086</i>   | 39.1        | 0.00005 | 0.00128109 |
| ENSMUSG00000094559 | <i>Cyp2d34</i>  | 29.5        | 0.0001  | 0.00236173 |
| ENSMUSG00000057074 | <i>Ces1g</i>    | 21.1        | 0.00005 | 0.00128109 |
| ENSMUSG00000001943 | <i>Vsig2</i>    | 20.4        | 0.00155 | 0.0230212  |
| ENSMUSG00000033847 | <i>Pla2g4c</i>  | 19.6        | 0.00005 | 0.00128109 |
| ENSMUSG00000022650 | <i>Retnlb</i>   | 18.2        | 0.00005 | 0.00128109 |
| ENSMUSG00000068893 | <i>Sprr2a2</i>  | 17.2        | 0.00005 | 0.00128109 |
| ENSMUSG00000076666 | <i>Ighv14-4</i> | 15.2        | 0.00005 | 0.00128109 |
| ENSMUSG00000096672 | <i>Ighv1-63</i> | 14.1        | 0.0009  | 0.015004   |
| ENSMUSG00000026354 | <i>Lct</i>      | -1791.5     | 0.00005 | 0.00128109 |
| ENSMUSG00000021944 | <i>Gata4</i>    | -135.6      | 0.00005 | 0.00128109 |
| ENSMUSG00000029134 | <i>Plb1</i>     | -130.9      | 0.00005 | 0.00128109 |
| ENSMUSG00000024354 | <i>Slc23a1</i>  | -93.3       | 0.0022  | 0.0307049  |
| ENSMUSG00000035780 | <i>Ugt2a3</i>   | -79.9       | 0.00005 | 0.00128109 |
| ENSMUSG00000054422 | <i>Fabp1</i>    | -69.8       | 0.00005 | 0.00128109 |
| ENSMUSG00000027690 | <i>Slc2a2</i>   | -43.2       | 0.00005 | 0.00128109 |
| ENSMUSG00000030483 | <i>Cyp2b10</i>  | -40.5       | 0.00005 | 0.00128109 |
| ENSMUSG00000076655 | <i>Ighv4-1</i>  | -35.3       | 0.00005 | 0.00128109 |
| ENSMUSG00000005980 | <i>Dnase1</i>   | -33.7       | 0.00005 | 0.00128109 |

**Supplementary Table S3.** List of up-regulated and down-regulated genes in the intestinal mucosa in *fat-1* EtOH compared to *fat-1* pair-fed control mice. The top 10 up-regulated and down-regulated genes are shown in a list (by fold-change) (selected from 1045 up- and 1062 down-regulated genes).

| Identifier         | Gene title           | Fold change | p-value | q-value    |
|--------------------|----------------------|-------------|---------|------------|
| ENSMUSG00000027556 | <i>Car1</i>          | 1454.1      | 0.00345 | 0.027756   |
| ENSMUSG00000094559 | <i>Cyp2d34</i>       | 258.4       | 0.00315 | 0.0258838  |
| ENSMUSG00000026390 | <i>Marco</i>         | 151.1       | 0.00135 | 0.0136846  |
| ENSMUSG00000022650 | <i>Retnlb</i>        | 131.0       | 0.0014  | 0.0140118  |
| ENSMUSG00000031089 | <i>Slc6a14</i>       | 105.5       | 0.00005 | 0.00092057 |
| ENSMUSG00000037362 | <i>Nov</i>           | 96.6        | 0.00005 | 0.00092057 |
| ENSMUSG00000033579 | <i>Fa2h</i>          | 87.0        | 0.00005 | 0.00092057 |
| ENSMUSG00000013653 | <i>1810065E05Rik</i> | 71.2        | 0.00005 | 0.00092057 |
| ENSMUSG00000096001 | <i>2610528A11Rik</i> | 47.3        | 0.00005 | 0.00092057 |
| ENSMUSG00000024039 | <i>Cbs</i>           | 42.6        | 0.00005 | 0.00092057 |
| ENSMUSG00000026354 | <i>Lct</i>           | -1668.9     | 0.00005 | 0.00092057 |
| ENSMUSG00000030483 | <i>Cyp2b10</i>       | -274.6      | 0.00005 | 0.00092057 |
| ENSMUSG00000035780 | <i>Ugt2a3</i>        | -217.1      | 0.00005 | 0.00092057 |
| ENSMUSG00000021944 | <i>Gata4</i>         | -191.2      | 0.00005 | 0.0210196  |
| ENSMUSG00000029134 | <i>Plb1</i>          | -166.9      | 0.00005 | 0.00092057 |
| ENSMUSG00000002992 | <i>Apoc2</i>         | -151.5      | 0.00005 | 0.00092057 |
| ENSMUSG00000074373 | <i>Gm10680</i>       | -120.0      | 0.00045 | 0.0058381  |
| ENSMUSG00000036216 | <i>Leap2</i>         | -115.0      | 0.00005 | 0.00092057 |
| ENSMUSG00000032080 | <i>Apoa4</i>         | -106.5      | 0.00335 | 0.0270893  |
| ENSMUSG00000019989 | <i>Enpp3</i>         | -106.3      | 0.00005 | 0.00092057 |

**Supplementary Table S4.** List of commonly up-regulated and down-regulated genes in the intestinal mucosa in *fat-1* and WT mice in response to EtOH. The top 10 up-regulated and down-regulated genes (by fold-change) are shown in a list (selected from 310 up- and 525 down-regulated genes).

| Identifier         | Gene title           | <i>Fat-1</i> EtOH vs <i>fat-1</i> PF |         |            | WT EtOH vs WT PF |         |            |
|--------------------|----------------------|--------------------------------------|---------|------------|------------------|---------|------------|
|                    |                      | fold                                 | p-value | q-value    | fold             | p-value | q-value    |
| ENSMUSG00000094559 | <i>Cyp2d34</i>       | 258.4                                | 0.00315 | 0.0258838  | 29.5             | 0.0001  | 0.00236173 |
| ENSMUSG00000022650 | <i>Retnlb</i>        | 131.0                                | 0.0014  | 0.0140118  | 18.2             | 0.00005 | 0.00128109 |
| ENSMUSG00000031089 | <i>Slc6a14</i>       | 105.5                                | 0.00005 | 0.00092057 | 6.7              | 0.00005 | 0.00128109 |
| ENSMUSG00000033579 | <i>Fa2h</i>          | 87.0                                 | 0.00005 | 0.00092057 | 8.3              | 0.00005 | 0.00128109 |
| ENSMUSG00000013653 | <i>1810065E05Rik</i> | 71.2                                 | 0.00005 | 0.00092057 | 8.3              | 0.00005 | 0.00128109 |
| ENSMUSG00000096001 | <i>2610528A11Rik</i> | 47.3                                 | 0.00005 | 0.00092057 | 3.8              | 0.00005 | 0.00128109 |
| ENSMUSG00000024039 | <i>Cbs</i>           | 42.6                                 | 0.00005 | 0.00092057 | 4.6              | 0.00005 | 0.00128109 |
| ENSMUSG00000027870 | <i>Hao2</i>          | 38.9                                 | 0.00005 | 0.00092057 | 8.4              | 0.00005 | 0.00128109 |
| ENSMUSG00000027875 | <i>Hmgcs2</i>        | 35.2                                 | 0.00005 | 0.00092057 | 9.1              | 0.00005 | 0.00128109 |
| ENSMUSG00000026811 | <i>St6galnac6</i>    | 32.3                                 | 0.00005 | 0.00092057 | 4.5              | 0.00005 | 0.00128109 |
| ENSMUSG00000026354 | <i>Lct</i>           | -1668.9                              | 0.00005 | 0.00092057 | -1791.6          | 0.00005 | 0.00128109 |
| ENSMUSG00000030483 | <i>Cyp2b10</i>       | -274.6                               | 0.00005 | 0.00092057 | -40.5            | 0.00005 | 0.00128109 |
| ENSMUSG00000035780 | <i>Ugt2a3</i>        | -217.1                               | 0.00005 | 0.00092057 | -79.9            | 0.00005 | 0.00128109 |
| ENSMUSG00000021944 | <i>Gata4</i>         | -191.2                               | 0.0024  | 0.0210196  | -135.6           | 0.00005 | 0.00128109 |
| ENSMUSG00000029134 | <i>Plb1</i>          | -166.9                               | 0.00005 | 0.00092057 | -130.9           | 0.00005 | 0.00128109 |
| ENSMUSG00000002992 | <i>Apoc2</i>         | -151.5                               | 0.00005 | 0.00092057 | -19.9            | 0.00005 | 0.00128109 |
| ENSMUSG00000074373 | <i>Gm10680</i>       | -120.0                               | 0.00045 | 0.0058381  | -20.6            | 0.00025 | 0.00525227 |
| ENSMUSG00000036216 | <i>Leap2</i>         | -115.0                               | 0.00005 | 0.00092057 | -11.2            | 0.00005 | 0.00128109 |
| ENSMUSG00000032080 | <i>Apoa4</i>         | -106.5                               | 0.00335 | 0.0270893  | -20.5            | 0.00005 | 0.00128109 |
| ENSMUSG00000019989 | <i>Enpp3</i>         | -106.3                               | 0.00005 | 0.00092057 | -25.2            | 0.00005 | 0.00128109 |

**Supplementary Table S5.** List of genes exclusively up-regulated and down-regulated in the intestinal mucosa in WT mice in response to EtOH. The top 10 up-regulated and down-regulated genes (by fold-change) are shown in a list (selected from 171 up- and 138 down-regulated genes).

| Identifier         | Gene title           | Fold change | p-value | q-value    |
|--------------------|----------------------|-------------|---------|------------|
| ENSMUSG00000032122 | <i>Slc37a2</i>       | 47.2        | 0.00005 | 0.00128109 |
| ENSMUSG00000076666 | <i>Ighv14-4</i>      | 15.2        | 0.00005 | 0.00128109 |
| ENSMUSG00000096672 | <i>Ighv1-63</i>      | 14.1        | 0.0009  | 0.015004   |
| ENSMUSG00000050296 | <i>Abca12</i>        | 13.2        | 0.00005 | 0.00128109 |
| ENSMUSG00000086474 | <i>9130204K15Rik</i> | 11.6        | 0.0003  | 0.00615377 |
| ENSMUSG00000065037 | <i>Rn7sk</i>         | 11.0        | 0.00025 | 0.00525227 |
| ENSMUSG00000098814 | <i>Igkv19-93</i>     | 6.7         | 0.00005 | 0.00128109 |
| ENSMUSG00000079174 | <i>Gm3054</i>        | 6.1         | 0.00005 | 0.00128109 |
| ENSMUSG00000095204 | <i>Ighv1-52</i>      | 5.7         | 0.00005 | 0.00128109 |
| ENSMUSG00000086389 | <i>Gm15998</i>       | 5.2         | 0.0015  | 0.0224225  |
| ENSMUSG00000054422 | <i>Fabp1</i>         | -69.8       | 0.00005 | 0.00128109 |
| ENSMUSG00000094164 | <i>Ighv2-3</i>       | -16.1       | 0.00005 | 0.00128109 |
| ENSMUSG00000094993 | <i>Igkv4-51</i>      | -15.1       | 0.00075 | 0.0130517  |
| ENSMUSG00000014351 | <i>Gip</i>           | -14.3       | 0.00005 | 0.00128109 |
| ENSMUSG00000104452 | <i>Ighv8-8</i>       | -8.2        | 0.00005 | 0.00128109 |
| ENSMUSG00000032454 | <i>Rbp2</i>          | -7.7        | 0.00005 | 0.00128109 |
| ENSMUSG00000102888 | <i>Ighv1-11</i>      | -7.5        | 0.00035 | 0.00701364 |
| ENSMUSG00000076538 | <i>Igkv13-84</i>     | -7.4        | 0.0005  | 0.00940854 |
| ENSMUSG00000076532 | <i>Igkv4-91</i>      | -6.9        | 0.00005 | 0.00128109 |
| ENSMUSG00000029082 | <i>Bst1</i>          | -6.5        | 0.00005 | 0.00128109 |

**Supplementary Table S6.** List of genes exclusively up-regulated and down-regulated in the intestinal mucosa in *fat-1* mice in response to EtOH. The top 10 up-regulated and down-regulated genes (by fold-change) are shown in a list (selected from 735 up- and 537 down-regulated genes).

| Identifier          | Gene title      | Fold change | p-value | q-value    |
|---------------------|-----------------|-------------|---------|------------|
| ENSMUSG00000027556  | <i>Car1</i>     | 1454.1      | 0.00345 | 0.027756   |
| ENSMUSG00000026390  | <i>Marco</i>    | 151.1       | 0.00135 | 0.0136846  |
| ENSMUSG00000037362  | <i>Nov</i>      | 96.6        | 0.00005 | 0.00092057 |
| ENSMUSG00000032068  | <i>Plet1</i>    | 30.9        | 0.00005 | 0.00092057 |
| ENSMUSG00000021803  | <i>Cdhr1</i>    | 29.8        | 0.00125 | 0.0128913  |
| ENSMUSG00000048337  | <i>Npy4r</i>    | 26.6        | 0.0009  | 0.0100225  |
| ENSMUSG00000046589  | <i>Lrrc8e</i>   | 17.8        | 0.0009  | 0.0100225  |
| ENSMUSG00000032028  | <i>Nxpe2</i>    | 14.9        | 0.00005 | 0.00092057 |
| ENSMUSG00000017723  | <i>Wfdc2</i>    | 14.8        | 0.00005 | 0.00092057 |
| ENSMUSG00000029088  | <i>Kcnp4</i>    | 14.5        | 0.00035 | 0.00481741 |
| ENSMUSG00000041660  | <i>Bbox1</i>    | -58.5       | 0.00005 | 0.00092057 |
| ENSMUSG00000068323  | <i>Slc4a5</i>   | -25.4       | 0.00005 | 0.00092057 |
| ENSMUSG00000005237  | <i>Dnah2</i>    | -19.8       | 0.00005 | 0.00092057 |
| ENSMUSG00000002324  | <i>Rec8</i>     | -18.5       | 0.00005 | 0.00092057 |
| ENSMUSG000000054932 | <i>Afp</i>      | -15.5       | 0.0027  | 0.0230512  |
| ENSMUSG000000095981 | <i>Ighv10-1</i> | -14.4       | 0.00005 | 0.00092057 |
| ENSMUSG00000038496  | <i>Slc19a3</i>  | -14.3       | 0.0001  | 0.00170036 |
| ENSMUSG00000076665  | <i>Ighv7-1</i>  | -13.7       | 0.00005 | 0.00092057 |
| ENSMUSG00000030402  | <i>Ppm1n</i>    | -10.9       | 0.0013  | 0.0132723  |
| ENSMUSG00000070332  | <i>Trim80</i>   | -9.8        | 0.0006  | 0.00729846 |

**Supplementary Table S7.** List of top 10 up-regulated and down-regulated genes (by fold-change) in the intestinal mucosa in *fat-1* EtOH compared to WT EtOH littermates (selected from 80 up- and 14 down-regulated genes).

| Identifier          | Gene title       | Fold change | p-value | q-value    |
|---------------------|------------------|-------------|---------|------------|
| ENSMUSG00000037362  | <i>Nov</i>       | 60.6        | 0.00005 | 0.00367576 |
| ENSMUSG00000032068  | <i>Plet1</i>     | 46.3        | 0.00005 | 0.00367576 |
| ENSMUSG00000065987  | <i>Cd209b</i>    | 19.5        | 0.00005 | 0.00367576 |
| ENSMUSG00000076674  | <i>Ighv1-85</i>  | 15.7        | 0.00005 | 0.00367576 |
| ENSMUSG00000039579  | <i>Grin3a</i>    | 13.6        | 0.00005 | 0.00367576 |
| ENSMUSG00000032028  | <i>Nxpe2</i>     | 10          | 0.00005 | 0.00367576 |
| ENSMUSG000000094806 | <i>Cyp2d10</i>   | 9.6         | 0.00015 | 0.0282662  |
| ENSMUSG00000055210  | <i>Foxd2</i>     | 8.9         | 0.0002  | 0.0341412  |
| ENSMUSG00000095457  | <i>Gm8989</i>    | 7.7         | 0.00005 | 0.0117016  |
| ENSMUSG00000019775  | <i>Rgs17</i>     | 6.9         | 0.0002  | 0.0341412  |
| ENSMUSG000000096150 | <i>Ighv3-8</i>   | -18.9       | 0.00005 | 0.00367576 |
| ENSMUSG00000076666  | <i>Igkv2-109</i> | -10.8       | 0.00005 | 0.00367576 |
| ENSMUSG00000076563  | <i>Igkv5-48</i>  | -7.5        | 0.00005 | 0.0117016  |
| ENSMUSG00000033847  | <i>Pla2g4c</i>   | -7.0        | 0.00005 | 0.0117016  |
| ENSMUSG00000031073  | <i>Fgf15</i>     | -6.8        | 0.00005 | 0.0117016  |
| ENSMUSG00000096833  | <i>Igkv4-55</i>  | -5.9        | 0.0002  | 0.0341412  |
| ENSMUSG00000076586  | <i>Igkv8-21</i>  | -4.7        | 0.00005 | 0.0117016  |
| ENSMUSG00000095571  | <i>Ighv5-17</i>  | -4.5        | 0.00005 | 0.0117016  |
| ENSMUSG00000094433  | <i>Igkv5-43</i>  | -3.1        | 0.00005 | 0.0117016  |
| ENSMUSG00000020826  | <i>Nos2</i>      | -2.9        | 0.00005 | 0.0117016  |
